# Supplementary material
Source: PubMed Central journal article supplement (PMC5404987)
Supplement: NIHMS857172-supplement-Supplementary_Material.pdf [file NIHMS857172-supplement-Supplementary_Material.pdf]

## Online supplement

**Supplementary Table I: Multivariate Associations of risk factors with Echocardiogram Findings of Interest in AIS (n=1377)**

| <b>Effect</b>              | <b>Odds Ratio</b> | <b>95% Wald Confidence Interval</b> |
|----------------------------|-------------------|-------------------------------------|
| Hypertroponinemia          | 2.93              | 2.02-4.26                           |
| Hx or current a.fib        | 1.64              | 1.08-2.51                           |
| Female                     | 0.52              | 0.36-0.76                           |
| Black                      | 1.72              | 1.12-2.66                           |
| Age (per 10 year increase) | 0.94              | 0.82-1.10                           |
| Hx of Cardiac Disease      | 4.89              | 2.95-8.10                           |

**Supplemental Table II: Outcome for AIS patient groups**

|                             | <b>AIS with cTn and Echocardiogram</b> | <b>AIS with cTn no Echocardiogram</b> | <b>AIS with Echocardiogram no cTn</b> | <b>AIS with no Echocardiogram no cTn</b> | <b>P-value*</b> |
|-----------------------------|----------------------------------------|---------------------------------------|---------------------------------------|------------------------------------------|-----------------|
| N                           | 1377                                   | 329                                   | 213                                   | 80                                       | 1377 vs 622     |
| Length of stay median (IQR) | 4 (2, 6)                               | 3 (2, 5)                              | 3 (2, 5)                              | 2 (1, 4)                                 | <0.0001         |
| 30 day mortality, n (%)     | 126 (9.2%)                             | 60 (18.2%)                            | 13 (6.1%)                             | 15 (18.8%)                               | 0.0008          |
| 1 year mortality, n (%)     | 287 (20.8%)                            | 116 (35.3%)                           | 38 (17.8%)                            | 32 (40.0%)                               | <0.0001         |
| 3 year mortality, n (%)     | 445 (32.3%)                            | 156 (47.4%)                           | 59 (27.7%)                            | 39 (48.8%)                               | 0.0002          |

*\*cTn and Echo vs missing cTn or Echo*

**Supplemental Table III: Multivariate odds of death after AIS in those with complete cardiac evaluation, excluding those with concurrent AMI; N=1328/1377**

| Variable                                      | Dead by 30 days<br>OR (95% CI) | Dead by 1 year<br>OR (95% CI) | Dead by 3 years<br>OR (95% CI) |
|-----------------------------------------------|--------------------------------|-------------------------------|--------------------------------|
| <b>Any Echocardiogram finding of interest</b> | <b>1.13 (0.60-2.15)</b>        | <b>1.36 (0.85-2.17)</b>       | <b>1.90 (1.22-2.95)*</b>       |
| Age (10 year increase)                        | 1.52 (1.21-1.93)*              | 1.74 (1.49-2.06)*             | 1.89 (1.65-2.18)*              |
| Atrial Fibrillation                           | 0.92 (0.52-1.60)               | 1.30 (0.88-1.91)              | 1.32 (0.93-1.88)               |
| Hx of Cardiac disease                         | 1.79 (0.99-3.23)               | 1.14 (0.77-1.67)              | 1.39 (1.00-1.94)*              |
| Hx of Diabetes                                | 0.68 (0.41-1.14)               | 1.12 (0.80-1.57)              | 1.16 (0.86-1.57)               |
| Hx of CKD                                     | 1.12 (0.62-2.05)               | 1.87 (1.26-2.80)*             | 1.49 (1.02-2.18)*              |
| Hx of Dementia                                | 1.26 (0.71-2.25)               | 1.24 (0.80-1.92)              | 1.73 (1.12-2.68)*              |
| Current smoking                               | 1.28 (0.68-2.41)               | 1.49 (0.98-2.29)              | 1.88 (1.30-2.71)*              |
| mRS 0-1                                       | 0.56 (0.32-1.00)               | 0.50 (0.34-0.72)              | 0.45 (0.33-0.62)               |
| rNIHSS (5 point increase)                     | 1.95 (1.74-2.21)*              | 1.59 (1.44-1.75)*             | 1.44 (1.31-1.59)*              |

*\*statistically significant*
